# Supplementary material for: Securing Things: A Novel CRO Applicable in PUF and Recycled IC Detection
Source: Research Square preprint supplement (doi:10.21203/rs.3.rs-1702083/v1), 2022-06-02
Supplement: Supplementary file 1 [file 21bdbd04083bdbeae35def21.pdf]

TABLE 1: RO BASED PUF AND SENSOR TOPOLOGY

| Sl. No. | Types of PUF                           |                                                               | Methodology                                                                                                                                                                                                                               | Conclusion                                                                                                                                                                                                                                                                                                 |
|---------|----------------------------------------|---------------------------------------------------------------|-------------------------------------------------------------------------------------------------------------------------------------------------------------------------------------------------------------------------------------------|------------------------------------------------------------------------------------------------------------------------------------------------------------------------------------------------------------------------------------------------------------------------------------------------------------|
| 1       | RO PUF [16]                            |                                                               | A group of RO is used to measure CRP                                                                                                                                                                                                      | <ul style="list-style-type: none"> <li>Pair of RO with lower frequency of separation led to degradation in reliability.</li> <li>Presence of large number of RO led to area overhead and oscillation mode of all individual RO during CRP extraction makes the power budget of RO PUF critical.</li> </ul> |
| 2       | CRO PUF [18]                           |                                                               | <ul style="list-style-type: none"> <li>Similar to RO PUF, but RO section is replaced with CRO</li> <li>In a group of k-pair of RO, only a pair with maximum frequency separation is selected to produce reliable response bit.</li> </ul> | <ul style="list-style-type: none"> <li>Enhances reliability against temperature variation.</li> <li>Unused pair of RO with lower frequency of separation are not considered, hence less number of CRPs.</li> <li>Area overhead due to added temperature compensating module.</li> </ul>                    |
| 3       | Hybrid RO [25]                         |                                                               | RO is designed by cascading positive and negative temperature co-efficient inverter to lower the frequency deviation against temperature variation.                                                                                       |                                                                                                                                                                                                                                                                                                            |
| 4       | Current starved inverter based RO [26] |                                                               | Family of current starved inverter with temperature invariant biasing is used.                                                                                                                                                            |                                                                                                                                                                                                                                                                                                            |
| 5       | Aging compensation techniques          | RO using FTL inverter [27]                                    | FTL based inverter is used rather than conventional CMOS inverter to lower the impact of NBTI.                                                                                                                                            | <ul style="list-style-type: none"> <li>Reliability degradation due to both temperature variation and aging is improved.</li> <li>Area overhead due to use of additional circuit module.</li> </ul>                                                                                                         |
| 6       |                                        | CRO using Aging Tolerant RO (ARO) [28]                        | Additional NMOS per inverter is used to lower the impact of NBTI                                                                                                                                                                          |                                                                                                                                                                                                                                                                                                            |
| 7       |                                        | Aging Resilient Current Starved inverter based RO (ACRO) [29] | Aging compensation module includes a MUX with PMOS and NMOS to lower NBTI.                                                                                                                                                                |                                                                                                                                                                                                                                                                                                            |
| 8       |                                        | CRO with reduced supply voltage [31]                          | The RO section is driven by a reduced supply voltage ( $V_{DD} - V_t$ ) to lower the impact of NBTI.                                                                                                                                      |                                                                                                                                                                                                                                                                                                            |
| Sl. No. | Types of RO sensor                     |                                                               | Methodology                                                                                                                                                                                                                               | Conclusion                                                                                                                                                                                                                                                                                                 |
| 1       | Conventional RO sensor [13]            |                                                               | <ul style="list-style-type: none"> <li>Frequency comparison between a pair of reference and stress RO predict the duration for which IC under test is used.</li> <li>The RO is designed by using conventional CMOS logic</li> </ul>       | Can detect the ICs used for months                                                                                                                                                                                                                                                                         |
| 2       | Accelerated Aging Mechanism            | N-CDIR sensor [32]                                            | Impact of NBTI on stress RO is accelerated by using NBTI aware RO.                                                                                                                                                                        | Can detect the ICs used few weeks                                                                                                                                                                                                                                                                          |
| 3       |                                        | AN-CDIR sensor [32]                                           | Multiple pair of RO with NBTI accelerate feature is used as reference and stress RO rather than a single pair of RO.                                                                                                                      | Can detect the ICs used few days                                                                                                                                                                                                                                                                           |
| 4       |                                        | RO sensor [34]                                                | Voltage control section enable different amount of NBTI stress on reference and stressed RO.                                                                                                                                              | Can detect the ICs used few weeks                                                                                                                                                                                                                                                                          |

TABLE 2 FUNCTIONAL MODE IN RO SENSOR

| Mode | Function                                                                                                                 |                                                  |
|------|--------------------------------------------------------------------------------------------------------------------------|--------------------------------------------------|
| 0    | Both ROs are in sleep Mode                                                                                               |                                                  |
| 1    | (RO) <sub>STR</sub> is in stress mode (subjected to NBTI) and (RO) <sub>REF</sub> remains in sleep mode (free from NBTI) |                                                  |
| 2    | Authentication Mode<br>(Frequency Comparison)                                                                            | frequency of ROs in stress module is measured    |
| 3    |                                                                                                                          | frequency of ROs in reference module is measured |

TABLE 3 SUPPLY VOLTAGE VARIATION IN PROPOSED INVERTER

| $[C_s C_g]$ | Operating voltage of RO |
|-------------|-------------------------|
| 00          | $V_{DD}, V_t$           |
| 01          | $V_{DD}, GND$           |
| 10          | $V_{DD}-V_t, V_t$       |
| 11          | $V_{DD}-V_t, GND$       |

TABLE 4 FREQUENCY DEGRADATION AGAINST AGING

| Types of RO                              | Aging Feature                  | % of degradation in $f_{osc}$ after 20 year | No. of extra MOS/<br>inverter |
|------------------------------------------|--------------------------------|---------------------------------------------|-------------------------------|
| Conventional CMOS RO [18]                | -                              | 26.61                                       | -                             |
| ARO [28]                                 | Lower NBTI                     | 9.42                                        | 2                             |
| NBTI-aware RO [32]                       | Accelerate NBTI                | 40.81                                       | 3                             |
| RO driven by reduced supply voltage [31] | Lower NBTI                     | 2.81                                        | 1                             |
| Proposed CRO                             | Lower NBTI stress ( $C_s=1$ )  | 1.111                                       | 4                             |
|                                          | Higher NBTI stress ( $C_s=0$ ) | 45.74                                       |                               |

TABLE 5 PERFORMANCE COMPARISON (IN %) OF PUF

| A. Security Metrics  |                       | Conventional CRO PUF [18] | ARO based CRO PUF [28] | CRO PUF with reduced supply voltage [31] | Proposed CRO PUF | Ideal value |
|----------------------|-----------------------|---------------------------|------------------------|------------------------------------------|------------------|-------------|
| Uniqueness           |                       | 43.06                     | 45.97                  | 48.01                                    | 48.95            | 50%         |
| Reliability          | Temperature variation | 91.817                    | -                      | 94.54                                    | 96.984           | 100%        |
|                      | Aging                 | 91.284                    | 93.322                 | 94.421                                   | 97.825           |             |
| Uniformity           |                       | 46.79                     | 46.19                  | 46.92                                    | 48.88            | 50%         |
| SAC                  |                       | 47.16                     | 46.44                  | 47.31                                    | 49.01            | 50%         |
|                      |                       |                           |                        |                                          |                  |             |
| B. VLSI Metrics      |                       |                           |                        |                                          |                  |             |
| Power <in mW>        |                       | 20.251                    | 10.455                 | 6.322                                    | 5.081            | -           |
| Area <in $\mu m^2$ > |                       | 656.22                    | 782.732                | 398.62                                   | 292.45           | -           |

TABLE 6 RELIABILITY AGAINST BEST AND WORST CHALLENGE PATTERN

| Challenge Pattern |                          |                          | Temperature variation | Aging  |
|-------------------|--------------------------|--------------------------|-----------------------|--------|
| Selection Line    | $[C_{s1} C_{s2} C_{s3}]$ | $[C_{g1} C_{g2} C_{g3}]$ |                       |        |
| Worst case        | [000]                    | [XXX]                    | 95.18                 | 96.011 |
| Best case         | [111]                    | [XXX]                    | 99.062                | 99.48  |

TABLE 7 RELIABILITY (IN %) OF PROPOSED CRO PUF ~ NUMBER OF CRO

| No. of CRO | Reliability           |        |
|------------|-----------------------|--------|
|            | Temperature variation | Aging  |
| 64         | 96.984                | 97.825 |
| 1024       | 96.027                | 97.162 |

TABLE 8 PERFORMANCE COMPARISON OF RO SENSOR

| Types of RO sensor  | Aging duration<br><in Days> |       |      |       |     | Area<br><in $\mu\text{m}^2$ > |
|---------------------|-----------------------------|-------|------|-------|-----|-------------------------------|
|                     | T=0 D                       | T=2 D |      | T=4 D |     |                               |
|                     | $\mu$                       | $\mu$ | % m  | $\mu$ | % m |                               |
| AN-CDIR sensor [32] | 0.384                       | 1.847 | 4.56 | 2.266 | 0   | 9068.254                      |
| Proposed CRO sensor | 0.214                       | 2.312 | 1.03 | 3.181 | 0   | 1415.645                      |
